# Supplementary material for: Mid-term treatment-related cognitive sequelae in glioma patients
Source: PubMed Central journal article supplement (PMC9325813; doi:10.1007/s11060-022-04044-1), 2022-07-07
Supplement: 11060_2022_4044_MOESM1_ESM.pdf [file 11060_2022_4044_MOESM1_ESM.pdf]

Supplementary material (Online Resource 1)

Manuscript title: Mid-term treatment-related cognitive sequelae in glioma patients

Journal: Journal of Neuro-Oncology

Authors: Sabine Schlömer, Jörg Felsberg, Milena Pertz, Bettina Hentschel, Markus Löffler, Gabriele Schackert, Dietmar Krex, Tareq Juratli, Joerg Christian Tonn, Oliver Schnell, Hartmut Vatter, Matthias Simon, Manfred Westphal, Tobias Martens, Michael Sabel, Martin Bendszus, Nils Dörner, Klaus Fliessbach, Christian Hoppe, Guido Reifenberger, Michael Weller, Uwe Schlegel

Corresponding author: Sabine Schlömer

Affiliation of corresponding author: Department of Neurology, University Hospital Knappschaftskrankenhaus, Ruhr University Bochum,  
In der Schornau 23-25, D-44892 Bochum, Germany

E-Mail address of corresponding author: [sabine.schloemer@kk-bochum.de](mailto:sabine.schloemer@kk-bochum.de)

## Description of the German Glioma Network and NeuroCog FX

### The German Glioma Network

The German Glioma Network (GGN) is a prospective, non-interventional cohort study involving eight clinical centers at university hospitals in Germany ([www.gliomnetzwerk.de](http://www.gliomnetzwerk.de)), and was supported by the German Cancer Aid for three funding periods from 2004 to 2012. The GGN realizes a collaboration of neurological, neurosurgical and neuropathological expertise dealing with translational research projects and issues of optimal treatment, prognostic factors and molecular analyses in glioma. The GGN provides an ideal and essential infrastructure to evaluate long-term prospective treatment-related neurotoxicity in a large patient cohort.

NeuroCog FX

**Table ESM-1** NeuroCog FX: Description of cognitive domains, tasks and standardized performance scores of NeuroCog FX subtests [28, 29, 30]

| <b>Subtest</b>                | <b>Domain</b>                                                 | <b>Task description</b>                                                                                                                                                                                                                          | <b>Norms for performance scores</b>                                                                             |
|-------------------------------|---------------------------------------------------------------|--------------------------------------------------------------------------------------------------------------------------------------------------------------------------------------------------------------------------------------------------|-----------------------------------------------------------------------------------------------------------------|
| Digit Span                    | Verbal short-term memory                                      | Presentation of a series of digits; immediate reproduction with digit keys. Increasing difficulty after correct answers.                                                                                                                         | Number of correct reproductions                                                                                 |
| Two back-test                 | Working memory                                                | Continuous presentation of single digits. Key press (space bar), when the present digit is identical with the penultimate digit.                                                                                                                 | Number of correct reactions minus number of incorrect reactions                                                 |
| Simple reaction time          | Reaction time, alertness                                      | Reaction at the appearance of a blue circle (space bar).                                                                                                                                                                                         | Median of reaction times                                                                                        |
| Selective attention (go/nogo) | Selective attention, inhibition of irrelevant reactions       | Reaction at the appearance of a blue circle (space bar), ignoration of yellow circles.                                                                                                                                                           | Median of reaction times                                                                                        |
| Inhibition (go/nogo)          | Inhibition of irrelevant reactions, cognitive flexibility     | Changed rule: Reaction at the appearance of yellow circles (space bar), ignoration of blue circles.                                                                                                                                              | Median of reaction times                                                                                        |
| Verbal memory                 | Verbal memory: verbal learning and recognition                | Word list learning: 3 learning trials, 12 words. Yes/No-recognition (test items : distractor items 1 : 2) after each learning trial and delayed recognition after subtest „figural memory“. Yes = space bar (reaction time interval: 2 seconds). | Number of correctly recognized test items (hits) minus number of incorrect "Yes"-classifications (false alarms) |
| Figural memory                | Figural memory: figural (non-verbal) learning and recognition | Analogous to verbal memory subtest. 3 learning trials, 8 checker board-like pattern with 4 highlighted fields in a 3x3 matrix.                                                                                                                   | Analogous to verbal memory subtest                                                                              |
| Verbal fluency                | Phonematic-literal word fluency                               | Naming as many words beginning with letter "P" ("L", "S" in alternative versions)                                                                                                                                                                | Number of correctly produced words                                                                              |
