# Supplementary material for: Mid-term treatment-related cognitive sequelae in glioma patients
Source: PubMed Central journal article supplement (PMC9325813; doi:10.1007/s11060-022-04044-1), 2022-07-07
Supplement: 11060_2022_4044_MOESM2_ESM.pdf [file 11060_2022_4044_MOESM2_ESM.pdf]

Supplementary material (Online Resource 2)

Manuscript title: Mid-term treatment-related cognitive sequelae in glioma patients

Journal: Journal of Neuro-Oncology

Authors: Sabine Schlömer, Jörg Felsberg, Milena Pertz, Bettina Hentschel, Markus Löffler, Gabriele Schackert, Dietmar Krex, Tareq Juratli, Joerg Christian Tonn, Oliver Schnell, Hartmut Vatter, Matthias Simon, Manfred Westphal, Tobias Martens, Michael Sabel, Martin Bendszus, Nils Dörner, Klaus Fliessbach, Christian Hoppe, Guido Reifenberger, Michael Weller, Uwe Schlegel

Corresponding author: Sabine Schlömer

Affiliation of corresponding author: Department of Neurology, University Hospital Knappschaftskrankenhaus, Ruhr University Bochum,  
In der Schornau 23-25, D-44892 Bochum, Germany

E-Mail address of corresponding author: [sabine.schloemer@kk-bochum.de](mailto:sabine.schloemer@kk-bochum.de)

**Table ESM-2** Neurocognitive change within and between treatment groups. T-test statistics for mean extent of cognitive improvement (i.e. mean difference [in percentile ranks] between baseline [T1] and follow-up [T2] neuropsychological assessment), separated for patients with radiotherapy (RT), chemotherapy (ChT), combined radio-chemotherapy (RChT) and patients followed by watch-and-wait strategy. Asterisks indicate statistically significant cognitive improvement. ANOVA (with F-statistics) for differences in cognitive change between treatment groups. CI confidence interval, df degree of freedom. \*  $p < .05$ , \*\*  $p < .01$ , \*\*\*  $p < .001$

|                      | RT (n = 10)                                                       |              |         | ChT (n = 21)                                                      |              |          | RChT (n = 24)                                                     |              |         | Watch-and-wait (n = 31)                                           |              |          | ANOVA   |      |         |
|----------------------|-------------------------------------------------------------------|--------------|---------|-------------------------------------------------------------------|--------------|----------|-------------------------------------------------------------------|--------------|---------|-------------------------------------------------------------------|--------------|----------|---------|------|---------|
|                      | Mean improvement between T1 and T2 (95% CI) [in percentile ranks] | t-value (df) | p-value | Mean improvement between T1 and T2 (95% CI) [in percentile ranks] | t-value (df) | p-value  | Mean improvement between T1 and T2 (95% CI) [in percentile ranks] | t-value (df) | p-value | Mean improvement between T1 and T2 (95% CI) [in percentile ranks] | t-value (df) | p-value  | F-value | df   | p-value |
| Short-term memory    | 0.4 (-26.9-27.7)                                                  | 0.03 (9)     | .974    | 18.1 (4.9-31.3)                                                   | 2.87 (20)    | .010*    | 4.9 (-5.6-15.4)                                                   | 0.97 (23)    | .344    | 13.3 (2.6-24.0)                                                   | 2.54 (30)    | .017*    | 1.26    | 3,82 | .293    |
| Working memory       | 7.3 (-18.7-33.3)                                                  | 0.65 (8)     | .534    | 26.7 (4.8-48.5)                                                   | 2.55 (20)    | .019*    | 18.5 (2.6-34.4)                                                   | 2.41 (23)    | .025*   | 16.0 (-2.9-35.0)                                                  | 1.73 (30)    | .094     | 0.44    | 3,81 | .727    |
| Simple reaction time | 18.5 (-1.9-38.9)                                                  | 2.05 (9)     | .07     | 6.76 (-6.6-20.2)                                                  | 1.05 (20)    | .305     | 20.6 (8.9-32.4)                                                   | 3.64 (22)    | .001**  | 9.4 (-3.1-22.0)                                                   | 1.53 (30)    | .136     | 1.01    | 3,81 | .392    |
| Selective attention  | 31.6 (-3.8-67.0)                                                  | 2.11 (7)     | .072    | 24.3 (10.3-38.4)                                                  | 3.61 (20)    | .002**   | 24.6 (10.2-38.9)                                                  | 3.54 (22)    | .002**  | 15.9 (5.9-25.8)                                                   | 3.26 (30)    | .003**   | 0.73    | 3,79 | .535    |
| Inhibition           | 34.3 (11.8-56.7)                                                  | 3.61 (7)     | .009**  | 20.0 (8.0-32.0)                                                   | 3.47 (20)    | .002**   | 15.1 (0.2-30.0)                                                   | 2.10 (23)    | .047*   | 11.9 (-1.3-25.0)                                                  | 1.85 (30)    | .075     | 1.07    | 3,80 | .365    |
| Verbal memory        | 3.1 (-12.5-18.7)                                                  | 0.45 (9)     | .663    | 11.5 (-1.5-24.4)                                                  | 1.85 (20)    | .080     | 7.4 (-0.7-15.5)                                                   | 1.91 (21)    | .071    | 17.0 (6.8-27.1)                                                   | 3.41 (30)    | .002**   | 1.06    | 3,80 | .373    |
| Figural memory       | 15.3 (-15.0-45.6)                                                 | 1.14 (9)     | .283    | 26.7 (15.0-38.4)                                                  | 4.79 (19)    | <.001*** | 5.4 (-5.1-15.9)                                                   | 1.06 (23)    | .302    | 17.8 (8.9-26.7)                                                   | 4.12 (23)    | <.001*** | 2.39    | 3,74 | .076    |
| Fluency              | 31.4 (11.3-51.4)                                                  | 3.70 (7)     | .008**  | 7.1 (-6.8-21.0)                                                   | 1.07 (20)    | .300     | 14.4 (-0.4-29.1)                                                  | 2.02 (23)    | .055    | 12.6 (0.8-24.5)                                                   | 2.17 (30)    | .038*    | 1.13    | 3,80 | .344    |
