# Supplementary material for: Mid-term treatment-related cognitive sequelae in glioma patients
Source: PubMed Central journal article supplement (PMC9325813; doi:10.1007/s11060-022-04044-1), 2022-07-07
Supplement: 11060_2022_4044_MOESM4_ESM.pdf [file 11060_2022_4044_MOESM4_ESM.pdf]

Supplementary material (Online Resource 4)

Manuscript title: Mid-term treatment-related cognitive sequelae in glioma patients

Journal: Journal of Neuro-Oncology

Authors: Sabine Schlömer, Jörg Felsberg, Milena Pertz, Bettina Hentschel, Markus Löffler, Gabriele Schackert, Dietmar Krex, Tareq Juratli, Joerg Christian Tonn, Oliver Schnell, Hartmut Vatter, Matthias Simon, Manfred Westphal, Tobias Martens, Michael Sabel, Martin Bendszus, Nils Dörner, Klaus Fliessbach, Christian Hoppe, Guido Reifenberger, Michael Weller, Uwe Schlegel

Corresponding author: Sabine Schlömer

Affiliation of corresponding author: Department of Neurology, University Hospital Knappschaftskrankenhaus, Ruhr University Bochum,  
In der Schornau 23-25, D-44892 Bochum, Germany

E-Mail address of corresponding author: [sabine.schloemer@kk-bochum.de](mailto:sabine.schloemer@kk-bochum.de)

**Table ESM-4** Neurocognitive change within and between histopathological groups. T-test statistics for mean extent of cognitive improvement (i.e. mean difference [ $M_{diff}$ , in percentile ranks]) between baseline and follow-up neuropsychological assessment, separated for patients with oligodendroglioma and astrocytoma. Asterisks indicate statistically significant cognitive improvement. ANOVA (with F-statistics) for differences in cognitive change between histopathological groups. CI confidence interval, df degree of freedom. \*  $p < .05$ , \*\*  $p < .01$

|                      | Oligodendroglioma (n = 18) |         |    |         | Astrocytoma (n = 28) |         |    |         | ANOVA   |      |         |
|----------------------|----------------------------|---------|----|---------|----------------------|---------|----|---------|---------|------|---------|
|                      | $M_{diff}$ (95% CI)        | t-value | df | p-value | $M_{diff}$ (95% CI)  | t-value | df | p-value | F-value | df   | p-value |
| Short-term memory    | 10.7 (-3.1-24.5)           | 1.63    | 17 | .121    | 9.8 (-0.3-19.8)      | 2.0     | 27 | .056    | 0.01    | 1,45 | .910    |
| Working memory       | 20.4 (-1.4-42.3)           | 1.98    | 17 | .065    | 2.7 (-13.4-18.8)     | 0.35    | 27 | .732    | 1.91    | 1,45 | .174    |
| Simple reaction time | 18.8 (1.9-35.6)            | 2.35    | 17 | .031*   | 4.4 (-7.0-15.7)      | 0.79    | 27 | .438    | 2.35    | 1,45 | .133    |
| Selective attention  | 22.8 (5.7-39.9)            | 2.81    | 17 | .012*   | 17.7 (5.9-29.6)      | 3.07    | 26 | .005**  | 0.27    | 1,44 | .606    |
| Inhibition           | 26.7 (12.6-40.7)           | 4.01    | 17 | .001**  | 6.4 (-6.2-19.0)      | 1.05    | 26 | .304    | 4.79    | 1,44 | .034*   |
| Verbal memory        | 14.7 (2.8-26.5)            | 2.60    | 17 | .019*   | 13.9 (2.2-25.6)      | 2.46    | 25 | .021*   | 0.01    | 1,43 | .929    |
| Figural memory       | 13.8 (-1.6-29.2)           | 1.92    | 14 | .075    | 12.8 (0.4-25.2)      | 2.12    | 25 | .044*   | 0.01    | 1,40 | .915    |
| Fluency              | 7.2 (-10.1-24.4)           | 0.88    | 17 | .393    | 8.9 (-1.9-19.6)      | 1.69    | 27 | .104    | 0.03    | 1,45 | .856    |
